# Supplementary material for: Synthesis and characterization of a new isoxazolone-based nonlinear optical crystal: MPMOI
Source: Royal Society of Chemistry journal article supplement (doi:10.1039/d2ce01299e), 2023-01-01
Supplement: d2ce01299e1.pdf [file d2ce01299e1.pdf]

## Supporting Information (SI)

### **Synthesis and characterization of a new isoxazolone-based nonlinear optical crystal: MPMOI**

Ying Yang,<sup>a</sup> Jianjuan Zhao,<sup>a</sup> Xinyuan Zhang,<sup>\*,a</sup> Zhanggui Hu<sup>a</sup> and Yicheng Wu<sup>a</sup>

<sup>a</sup> Tianjin Key Laboratory of Functional Crystal Materials, Institute of Functional Crystals, Tianjin University of Technology, Tianjin 300384, PR. China.

## **Contents.**

**Figure S1.** (a) FT-IR and (b) Raman spectrum of MPMOI.

**Figure S2.** Chemical structure and hydrogen contacts in (a) MLS and (b) MPMI along *a* axis.

**Table S1.** The vibration modes of MPMOI.

**Table S2.** SHG properties of organic nonlinear optical crystals with similar ketone – methoxy group structures and the crystals mentioned in the article.

## 1. Supplementary Figures.

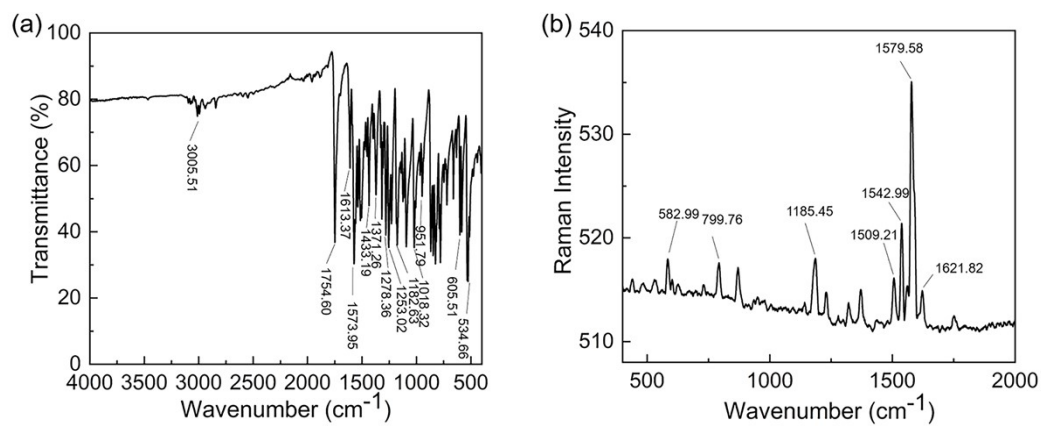

**Figure. S1.** (a) FT-IR and (b) Raman spectrum of MPMOI.

## Reported

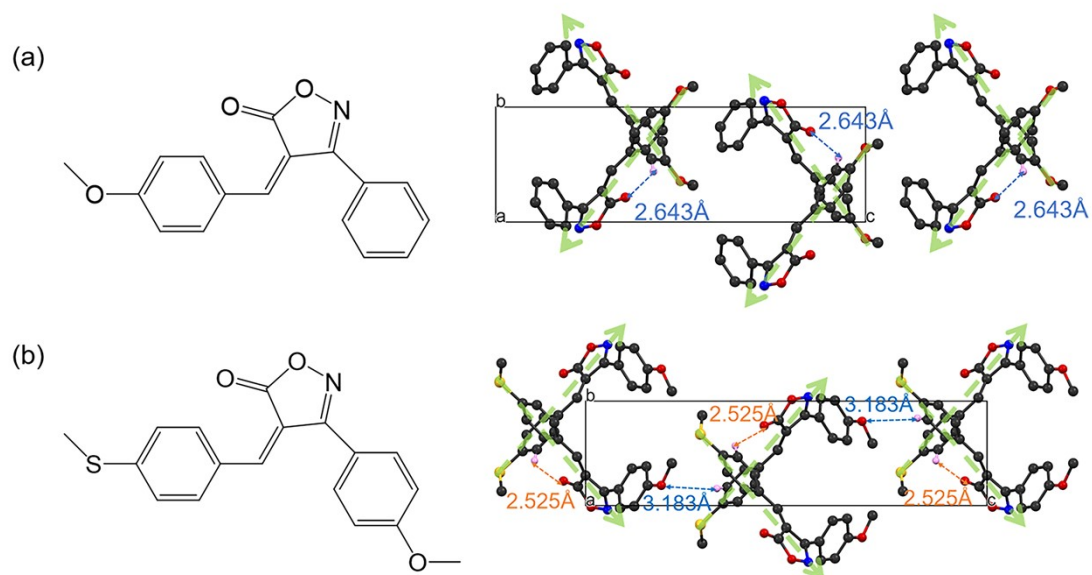

**Figure. S2.** Chemical structures and hydrogen contacts in (a) MLS and (b) MPMI viewed down along *a* axis.

## 2. Supplementary Tables.

**Table S1.** The vibration modes of MPMOI.

| $\nu_{\text{FT-IR}}$ ( $\text{cm}^{-1}$ ) | $\nu_{\text{Raman}}$ ( $\text{cm}^{-1}$ ) | Assignment                                                                      |
|-------------------------------------------|-------------------------------------------|---------------------------------------------------------------------------------|
| 534.66, 605.51                            |                                           | Deformation vibration of benzene ring <sup>S1</sup>                             |
|                                           | 799.76                                    | Symmetric vibration of C-O-C                                                    |
| 951.79                                    |                                           | =CH <sub>2</sub> oscillates out of the plane                                    |
| 1018.32                                   |                                           | C-O link to the alkyl group stretches                                           |
| 1182.63                                   |                                           | CH <sub>2</sub> wobbles out of the face                                         |
|                                           | 1185.45                                   | CH <sub>3</sub> out-of-plane bending <sup>15</sup>                              |
| 1253.02, 1278.36                          |                                           | Stretching vibration of aromatic ring C-C                                       |
| 1371.26                                   |                                           | Bending vibration of methyl groups <sup>S1</sup>                                |
| 1433.19                                   |                                           | Symmetrical bending vibrations of alkyl group (CH <sub>3</sub> -) <sup>S2</sup> |
| 1573.95                                   |                                           | Aromatic ring skeleton vibration                                                |
|                                           | 1509.28, 1542.99                          | C=C bonds                                                                       |
|                                           | 1579.58                                   | Aromatic ring C-C bond                                                          |
| 1754.60, 1613.37                          |                                           | Stretching vibration of C=O <sup>S2</sup>                                       |
| 3005.51                                   |                                           | C-H stretching of aromatic ring <sup>S3</sup>                                   |

**Table S2.** SHG properties of organic nonlinear optical crystals with similar ketone – methoxy group structures and the crystals mentioned in the article.

| Crystal Name | Chemical Structure                                                                  | Space Group               | SHG *              | Melting point | Ref.  |
|--------------|-------------------------------------------------------------------------------------|---------------------------|--------------------|---------------|-------|
| DMPP         | 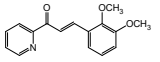   | Orthorhombic $Pca2_1$     | $\approx$ KDP      | 80            | 54    |
| BMP          |    | Orthorhombic $P2_12_12_1$ | $1.04 \times$ urea | 107           | 55    |
| 6MN4MPP      |    | Monoclinic $Pn$           | $2.18 \times$ KDP  | 137.4         | 15    |
| 6MN3MPP      |    | Orthorhombic $Pca2_1$     | $4.3 \times$ KDP   | 131.7         | 15    |
| EBC          |    | Monoclinic $P2_1$         | $20 \times$ KDP    | 127.45        | S4    |
| DAMC         |    | Orthorhombic $P2_12_12_1$ | $0.8 \times$ urea  | -             | 51,52 |
| DAMO         |   | Monoclinic $P2_1$         | $42.71 \times$ KDP | 129.63        | 51,52 |
| 4M5B2SC      |  | Monoclinic $Pc$           | $4.2 \times$ urea  | 141           | S5    |
| DMMC         |  | Monoclinic $P2_1$         | $58 \times$ KDP    | 95.59         | S6    |
| 3,4-DABP     |  | Monoclinic $C_2$          | $2.3 \times$ KDP   | 121           | S7    |
| BBP          |  | Orthorhombic $P2_12_12_1$ | $2.03 \times$ KDP  | 280           | S8    |
| TTMP         |  | Orthorhombic $Pna2_1$     | $1.95 \times$ urea | 152.65        | S9    |
| 5B2SNC       |  | Monoclinic $Cc$           | $26 \times$ urea   | 166.4         | S10   |
| HPMP         |  | Orthorhombic $Pca2_1$     | $1.86 \times$ KDP  | 95            | S11   |
| PMC          |  | Orthorhombic $P2_12_12_1$ | $6 \times$ urea    | 341           | S12   |
| MNC          |  | Orthorhombic $P2_12_12_1$ | $55 \times$ urea   | -             | S13   |
| 5CT4MP       |  | Monoclinic $Pc$           | $1.6 \times$ urea  | 115           | S14   |
| 3-CPDP       |  | Triclinic $P1$            | $1.4 \times$ urea  | 154           | S15   |
| 4BC          |  | -                         | $1.14 \times$ urea | -             | S16   |

| Crystal Name | Chemical Structure | Space Group               | SHG *                                   | Melting point | Ref.      |
|--------------|--------------------|---------------------------|-----------------------------------------|---------------|-----------|
| 2MPNP        |                    | Orthorhombic $Pca2_1$     | $2.75 \times \text{KDP}$                | 142.53        | S17       |
| 2,4,5-TMBC   |                    | Orthorhombic $P2_12_12_1$ | $1.8 \times \text{urea}$                | -             | S18       |
| BPP          |                    | Monoclinic $P2_1$         | $1.4 \times \text{urea}$                | -             | S19       |
| CPP          |                    | Monoclinic $P2_1$         | $3.67 \times \text{urea}$               | -             | S20       |
| MPP          |                    | Orthorhombic $Pna2_1$     | $4.7 \times \text{urea}$                | 81            | S21       |
| DCPP         |                    | Monoclinic $P2_1$         | $\approx \text{urea}$                   | 146.9         | S22       |
| MMPP         |                    | Orthorhombic $Pna2_1$     | $3.15 \times \text{urea}$               | 80            | S23       |
| MLS          |                    | Orthorhombic $Pna2_1$     | $1.5 \times \text{OH1}$<br>at 2090 nm   | 166           | 31        |
| OH-IPO       |                    | Orthorhombic $Fdd2$       | $0.7 \times \text{OH1}$<br>at 2090 nm   | 210           | 33        |
| UOH1         |                    | Tetragonal $I4_1$         | $3.3 \times \text{urea}$<br>at 800nm    | 172           | 30        |
| NPP          |                    | Monoclinic $P2_1$         | $d_{21}=48 \text{ pm/V}$<br>at 1150 nm  | 116           | 42        |
| BNA          |                    | Orthorhombic $Pna2_1$     | $d_{33}=234 \text{ pm/V}$<br>at 1064 nm | 106           | 43        |
| MPMOI        |                    | Orthorhombic $P2_12_12_1$ | $3.7 \times \text{KDP}$                 | 175           | This work |

\*The powder second harmonic generation test was performed under 1064 nm fundamental wavelength.

## Reference

- [S1] K. Xu, Q. T. Cui, D. G. Zhong, Z. Yu, T. H. Wang, L. F. Cao, Q. B. Wang, X. L. Yu and B. Teng, *Opt. Mater.*, 2021, **111**, 110655.
- [S2] T. P. Zhao, C. M. Wang, S. Y. Hu, S. H. Ji, C. Hu, K. Xu and B. Teng, *Opt. Mater.*, 2021, **112**, 110765.
- [S3] Q. T. Cui, R. M. Li, D. G. Zhong, F. You, K. Xu, H. Xu, T. H. Wang, J. J. Liu, L. F. Cao, J. Tang, W. X. Huang and B. Teng, *J. Cryst. Growth*, 2020, **547**, 125802.
- [S4] R. Chen, T. H. Wang, K. Xu, Q. B. Wang, J. K. Ma, L. Cao, F. You, B. Teng and J. Tang, *J. Mol. Struct.*, 2022, **1253**, 132243.
- [S5] V. S. Naik, P. S. Patil, Q. A. Wong, C. K. Quah, N. B. Gummagol and H. S. Jayanna, *J. Mol. Struct.*, 2020, **1222**, 128901.
- [S6] S. Hu, T. Zhao, K. Xu, S. Ji, L. Cao and B. Teng, *Optik*, 2021, **231**, 110765.
- [S7] S. Usharani, J. Judes, V. Natarajan, M. Arivanandhan, P. Anandan, D. A. Vorontsov and M. O. Marychev, *Opt. Mater.*, 2020, **100**, 109603.
- [S8] S. Satheeshchandra, D. Haleshappa, S. Rohith, A. Jayarama and N. Shetty, *Physica B: Condens. Matter*, 2019, **560**, 191-196.
- [S9] D. Haleshappa, A. Jayarama, R. Bairy, S. Acharya and P. S. Patil, *Physica B: Condens. Matter*, 2019, **555**, 125-132.
- [S10] P. S. Patil, S. R. Maidur, M. Shkir, S. AlFaify, V. Ganesh, K. N. Krishnakanth and S. V. Rao, *J. Appl. Crystallogr.*, 2018, **51**, 1035-1042.
- [S11] B. K. Revathi, D. R. Jonathan, S. Sathya and G. Usha, *J. Mol. Struct.*, 2018, **1154**, 496-503.
- [S12] J. S. John, D. Sajan, C. Narayana, N. Joy and R. Philip, *Opt. Mater.*, 2018, **84**, 409-421.
- [S13] S. R. Maidur, P. S. Patil, S. V. Rao, M. Shkir and S. M. Dharmaprakash, *Opt. Laser Technol.*, 2017, **97**, 219-228.
- [S14] V. S. Naik, G. Vinitha, A. Pragasam and V. Shettigar, *Indian J. of Phys.*, 2017, **91**, 925-932.
- [S15] T. C. S. Shetty, C. S. C. Kumar, S. Raghavendra, T. S. Chia, S. Chandraju, S. M. Dharmaprakash, C. K. Quah and H. K. Fun, *Mater. Technol.*, 2016, **32**, 140-147.
- [S16] A. P. Menezes, S. Raghavendra, A. Jayarama, H. P. Sarveshwara and S. M. Dharmaprakash, *J. Mol. Struct.*, 2016, **1119**, 167-176.
- [S17] S. R. Prabhu, A. Jayarama, V. Upadhyaya, K. S. Bhat and S. W. Ng, *Mol. Cryst. Liq. Cryst.*, 2015, **607**, 200-214.
- [S18] M. Shkir, S. Muhammad, S. AlFaify, A. Irfan, P. S. Patil, M. Arora, H. Algarni



and Z. Jingping, *RSC Adv.*, 2015, **5**, 87320-87332.

[S19] A. P. Menezes, A. Jayarama and S. W. Ng, *J. Mol. Struct.*, 2015, **1088**, 85-94.

[S20] A. Praveen Menezes, A. Jayarama and S. Weng Ng, *J. Cryst. Growth*, 2014, **402**, 130-137.

[S21] A. Jayarama, H. J. Ravindra, A. P. Menezes, S. M. Dharmaparakash and S. W. Ng, *J. Mol. Struct.*, 2013, **1051**, 285-291.

[S22] B. Ganapayya, A. Jayarama and S. M. Dharmaparakash, *Mol. Cryst. Liq. Cryst.*, 2013, **571**, 87-98.

[S23] P. C. Rajesh Kumar, V. Ravindrachary, K. Janardhana and B. Poojary, *J. Cryst. Growth*, 2012, **354**, 182-187.
